# Supplementary material for: Structural changes correlated with magnetic spin state isomorphism in the S2 state of the Mn4CaO5 cluster in the oxygen-evolving complex of photosystem II
Source: Chem Sci. 2016 May 9;7(8):5236–48. doi: 10.1039/c6sc00512h (PMC5201215; doi:10.1039/c6sc00512h)
Supplement: Supplementary file 1 [file SC-007-C6SC00512H-s001.pdf]

*Electronic Supporting Information*

**Structural Changes Correlated with Magnetic Spin State Isomorphism in the S<sub>2</sub> State  
of the Mn<sub>4</sub>CaO<sub>5</sub> Cluster in the Oxygen-Evolving Complex of  
Photosystem II**

Ruchira Chatterjee,<sup>a,#</sup> Guangye Han,<sup>a,#,§</sup> Jan Kern<sup>a,b</sup>, Sheraz Gul<sup>a</sup>, Franklin D. Fuller<sup>a</sup>, Anna  
Garachtchenko<sup>a</sup>, Iris Young<sup>a</sup>, Tsu-Chien Weng<sup>c,¶</sup>, Dennis Nordlund<sup>c</sup>, Roberto Alonso-  
Mori<sup>b</sup>, Uwe Bergmann<sup>b,c</sup>, Dimosthenis Sokaras<sup>c</sup>, Makoto Hatakeyama<sup>d</sup>, Vittal K.  
Yachandra<sup>a,\*</sup>, Junko Yano<sup>a,\*</sup>

<sup>a</sup> Molecular Biophysics and Integrated Bioimaging Division, Lawrence Berkeley National  
Laboratory, Berkeley, CA, USA

<sup>b</sup> LCLS, SLAC National Accelerator Laboratory, Menlo Park, CA

<sup>c</sup> Center for High Pressure Science & Technology Advanced Research, Shanghai, China.

<sup>d</sup> SSRL, SLAC National Accelerator Laboratory, Menlo Park, CA

<sup>e</sup> PULSE, SLAC National Accelerator Laboratory, Menlo Park, CA

<sup>f</sup> RIKEN Research Cluster for Innovation, Wako, Saitama, Japan

### EXAFS curve-fitting procedure

Curve fitting was performed with Artemis and IFEFFIT software using *ab initio*-calculated phases and amplitudes from the program FEFF 8.2.<sup>1,2</sup> These *ab initio* phases and

$$\chi(k) = S_0^2 \sum_j \frac{N_j}{k R_j^2} f_{\text{eff},j}(\pi, k, R_j) e^{-2\sigma_j^2 k^2} e^{-2R_j/\lambda_j(k)} \sin(2kR_j + \phi_{ij}(k)) \quad (\text{S1})$$

amplitudes were used in the EXAFS equation (S1):

The neighboring atoms to the central atom(s) are divided into  $j$  shells, with all atoms with the same atomic number and distance from the central atom grouped into a single shell. Within each shell, the coordination number  $N_j$  denotes the number of neighboring  $f_{\text{eff},j}(\pi, k, R_j)$  atoms in shell  $j$  at a distance of  $R_j$  from the central atom.  $f_{\text{eff},j}$  is the *ab initio* amplitude function for shell  $j$ , and the Debye-Waller term  $e^{-2\sigma_j^2 k^2}$  accounts for damping due to static and thermal disorder in absorber-backscatterer distances. The mean free path term  $e^{-2R_j/\lambda_j(k)}$  reflects losses due to inelastic scattering, where  $\lambda_j(k)$  is the electron mean free path. The oscillations in the EXAFS spectrum are reflected in the sinusoidal term,  $\sin(2kR_j + \phi_{ij}(k))$  where  $\phi_{ij}(k)$  is the *ab initio* phase function for shell  $j$ .  $S_0^2$  is an amplitude reduction factor due to shake-up/shake-off processes at the central atom(s). The EXAFS equation was used to fit the experimental data using  $N$ ,  $R$ , and the EXAFS Debye-Waller factor ( $\sigma^2$ ) as variable parameters.  $E_0$  was defined as 6545.0 eV and the  $S_0^2$  value was fixed to 0.85 for the energy (eV) to wave vector ( $k$ , Å<sup>-1</sup>) axis conversion. Note that fits are comparisons to proposed models thus the  $N$  parameter is fixed, while the Debye-Waller is varied to get the best fit. Fixing the Debye-Waller factor could bias one model more than the other.  $R^2$ , the R-factor goodness of fit is:

$$R^2 = \frac{1}{N} \sum_i \left| \frac{1}{s_i} [\chi^{\text{expt}}(k_i) - \chi^{\text{calc}}(k_i)] \right|^2 \quad (\text{S2})$$

where  $N$  is the total number of data points collected,  $\chi^{\text{expt}}(k_i)$  is the experimental EXAFS amplitude at point  $i$ , and  $\chi^{\text{calc}}(k_i)$  is the theoretical EXAFS amplitude at point  $i$ . The normalization factor  $s_i$  is given by:

$$1/s_i = k_i^3 / \sum_j k_j^3 |\chi_j^{\text{expt}}(k_j)| \quad (\text{S3})$$

**Table S1.** Mn XANES pre-edge peak fit areas of (a) LS S<sub>2</sub> and (b) HS S<sub>2</sub> states.

|                         | Area under curve 1<br>(6540 eV) | Area under curve 2<br>(6541 eV) | Area under curve 3<br>(6542 eV) | Total area |
|-------------------------|---------------------------------|---------------------------------|---------------------------------|------------|
| LS S <sub>2</sub> state | 0.043                           | 0.130                           | 0.072                           | 0.245      |
| HS S <sub>2</sub> state | 0.024                           | 0.141                           | 0.064                           | 0.229      |

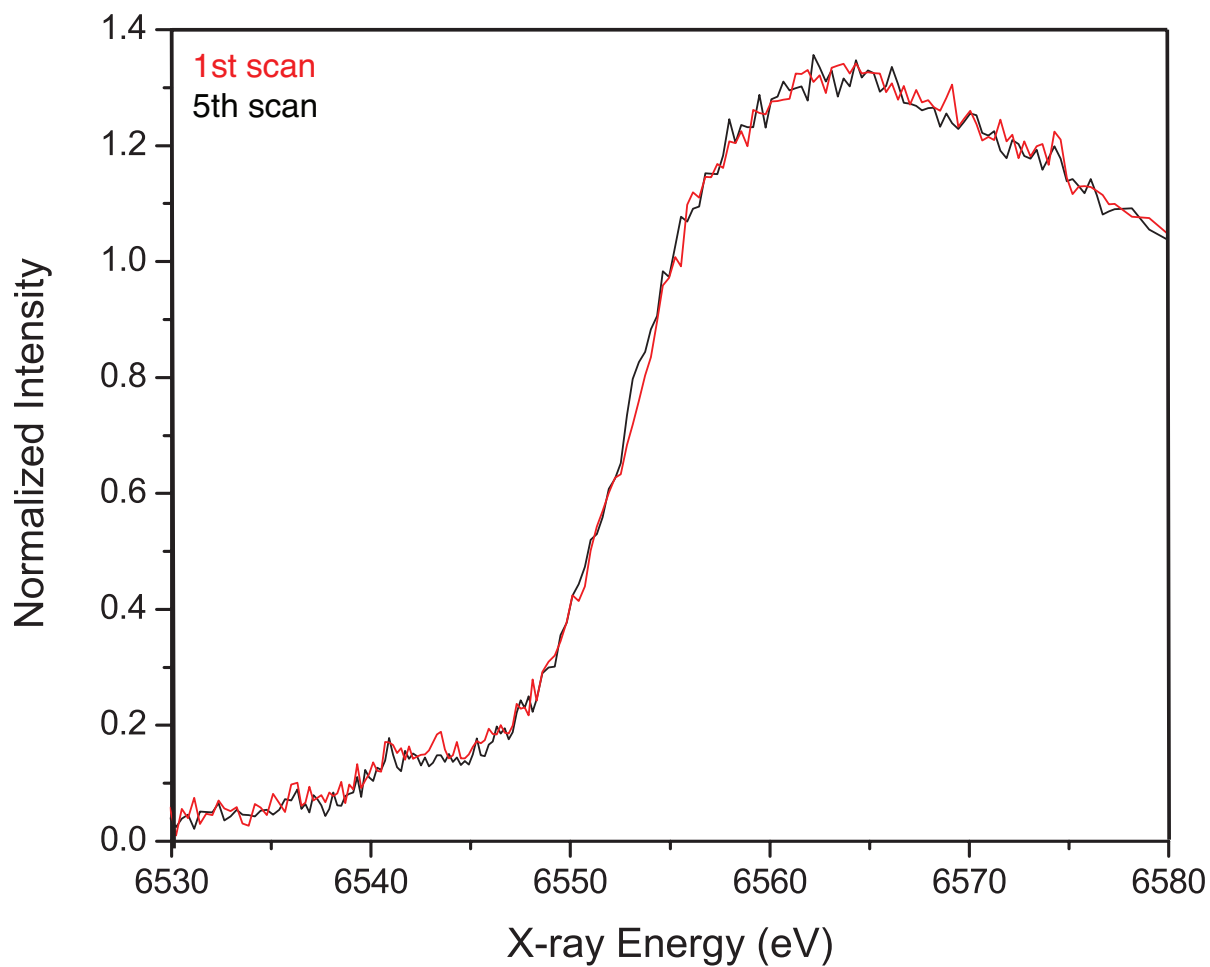

**Figure S1.** Mn XAS spectra of S<sub>2</sub> 140 K NIR illuminated 1<sup>st</sup> scan (red) and 5<sup>th</sup> scan (black). Respective scans from six sample spots were added for each spectrum shown here.

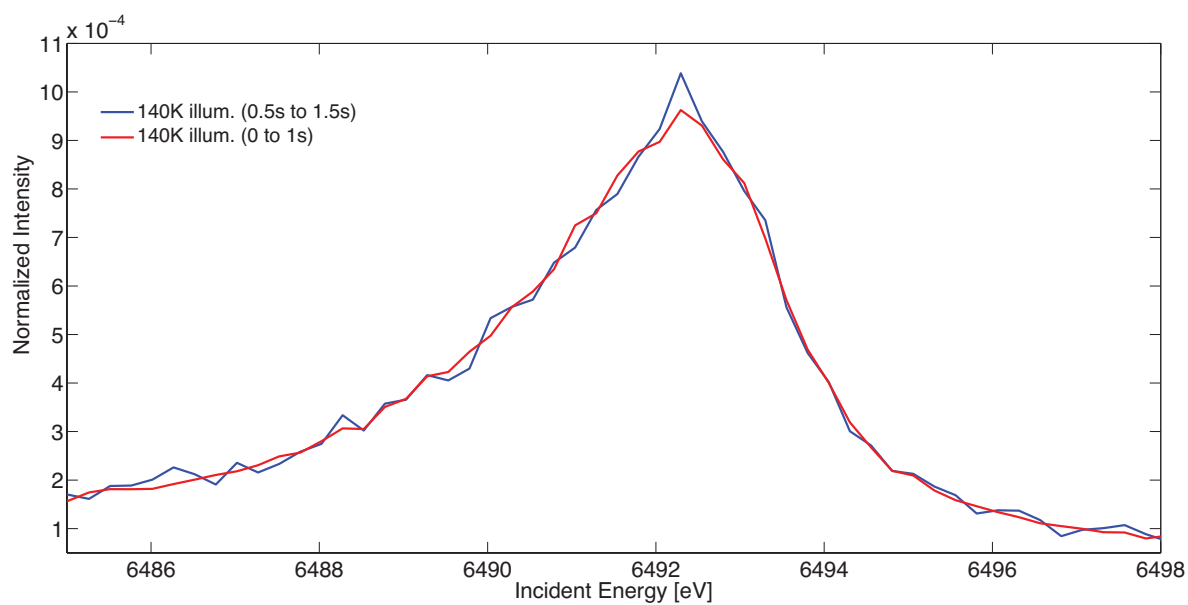

**Figure S1.** Mn XES spectra of S<sub>2</sub> 140 K NIR illuminated bin 11-30 (0.5s -1.5s) (blue) and first 20 bins (0- 1s) (red).

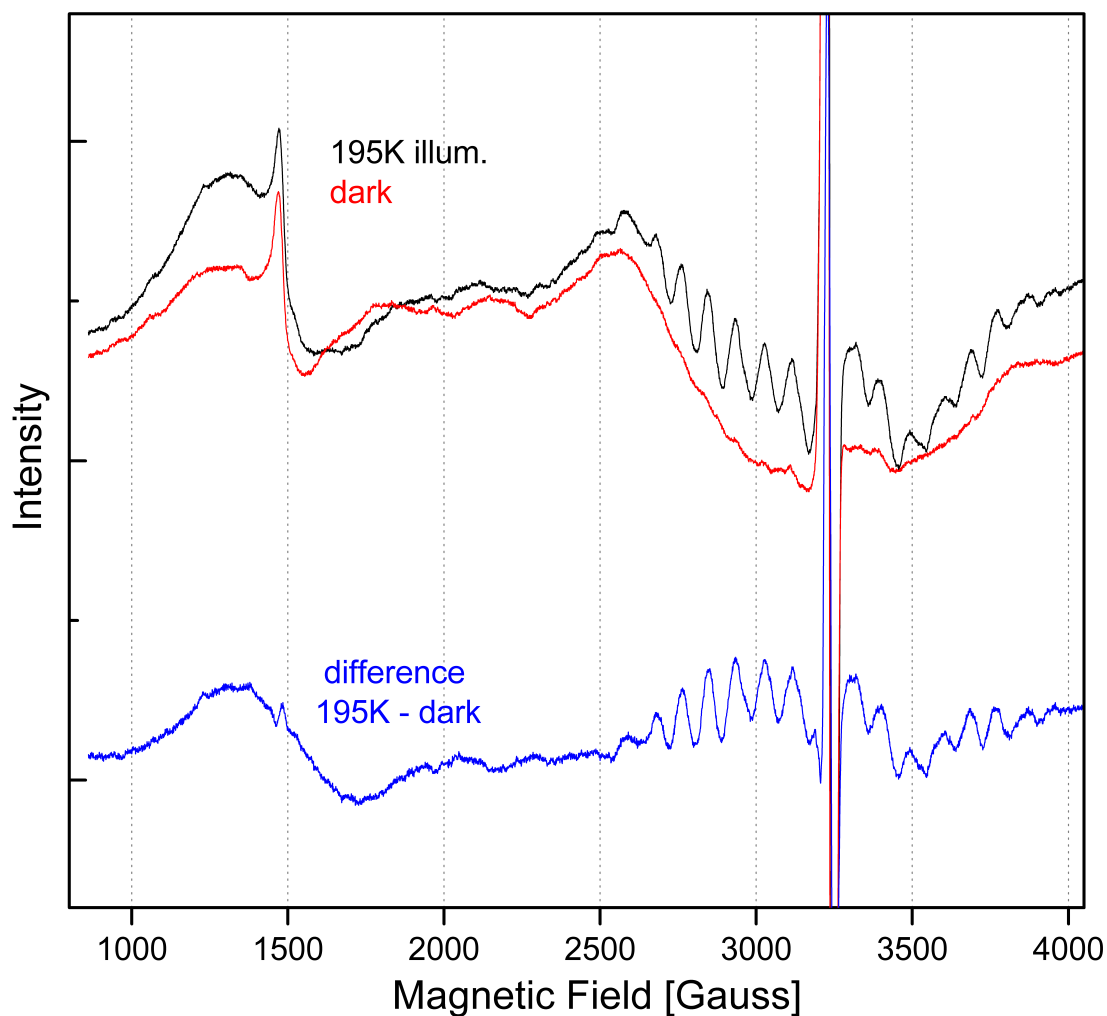

**Figure S3.** EPR spectra of PSII samples in sucrose illuminated for 10 mins at 195 K (black) and dark (red) EPR spectra. The difference spectrum (blue) is between the spectra after illumination and the spectra of the same dark-adapted sample. The spectra are the difference between the spectra after illumination and the spectra of the same dark-adapted sample. Spectrometer condition: microwave frequency, 9.22 GHz; field modulation amplitude, 32 G at 100 KHz; microwave power, 20 mW. The spectra are collected at 8K.

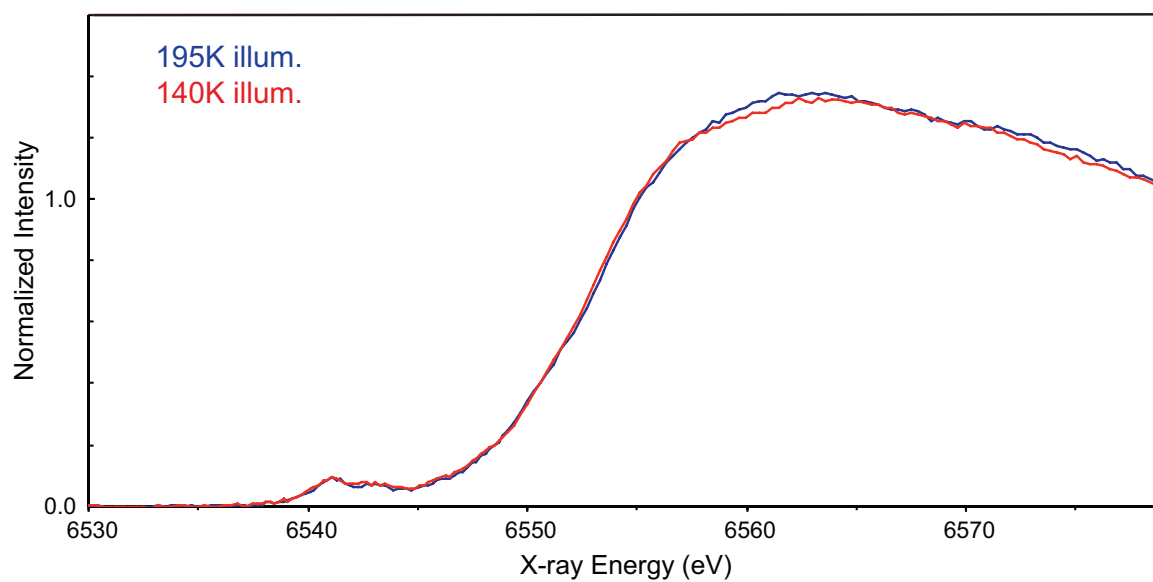

**Figure S4.** Mn XAS spectra of  $S_2$  195 K illuminated (blue) and 140 K NIR illuminated  $S_2$  states (red).

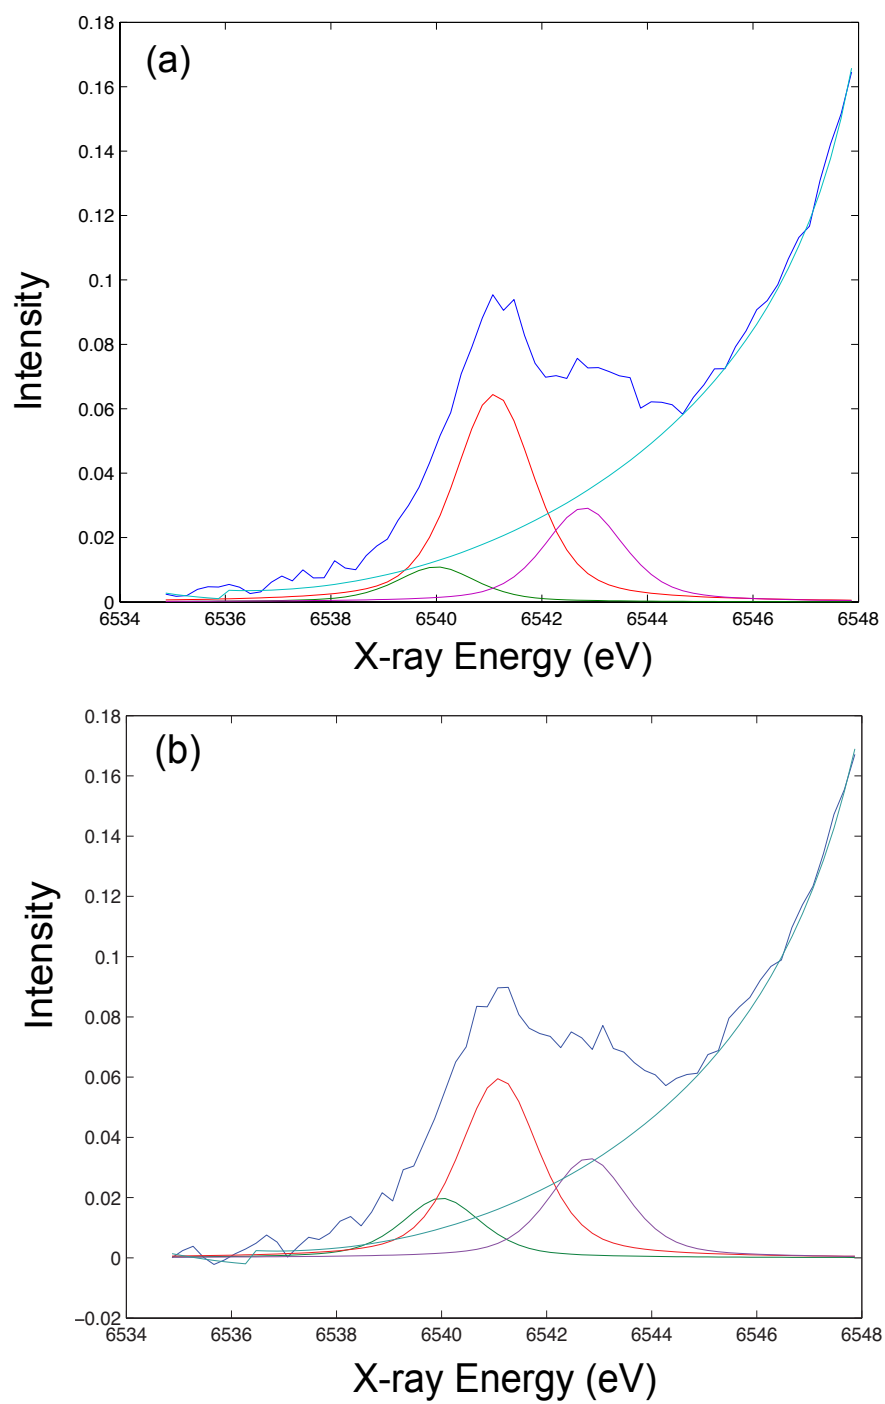

**Figure S5.** Mn XANES pre-edge peak fit of (a) LS  $S_2$  and (b) HS  $S_2$  states.

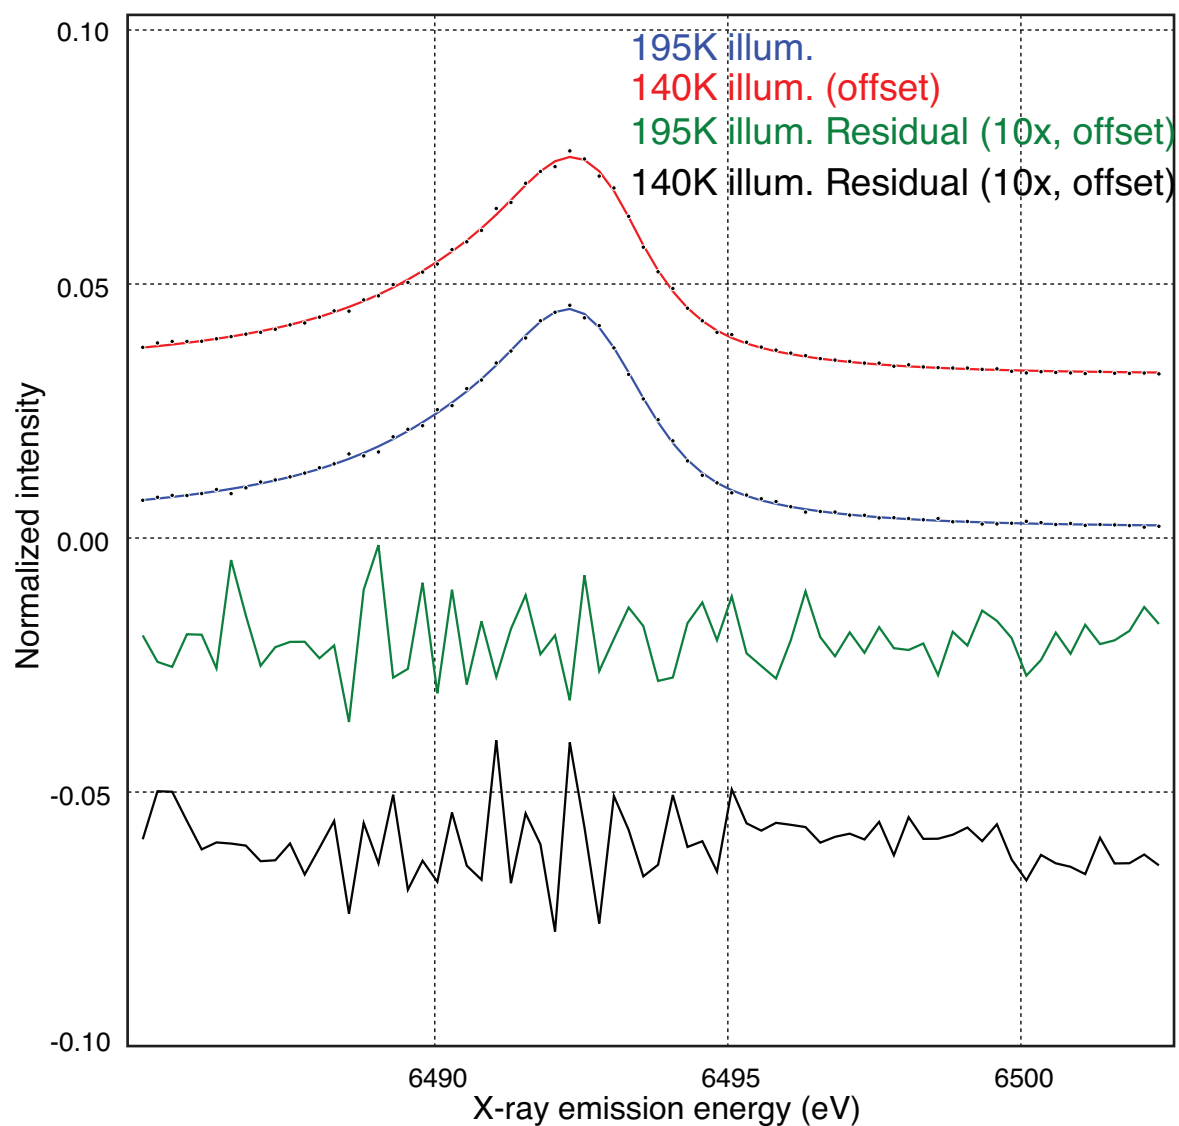

**Figure S6.** K $\beta_{1,3}$  XES spectra of 195K (blue) and 140 NIR (red) illuminated S<sub>2</sub> states. Raw data (dots) and the smoothed (lines) of both LS and HS states. The residual plots of the LS (green) and HS (black) S<sub>2</sub> states show that the smoothed spectra are a good fit of the raw data.

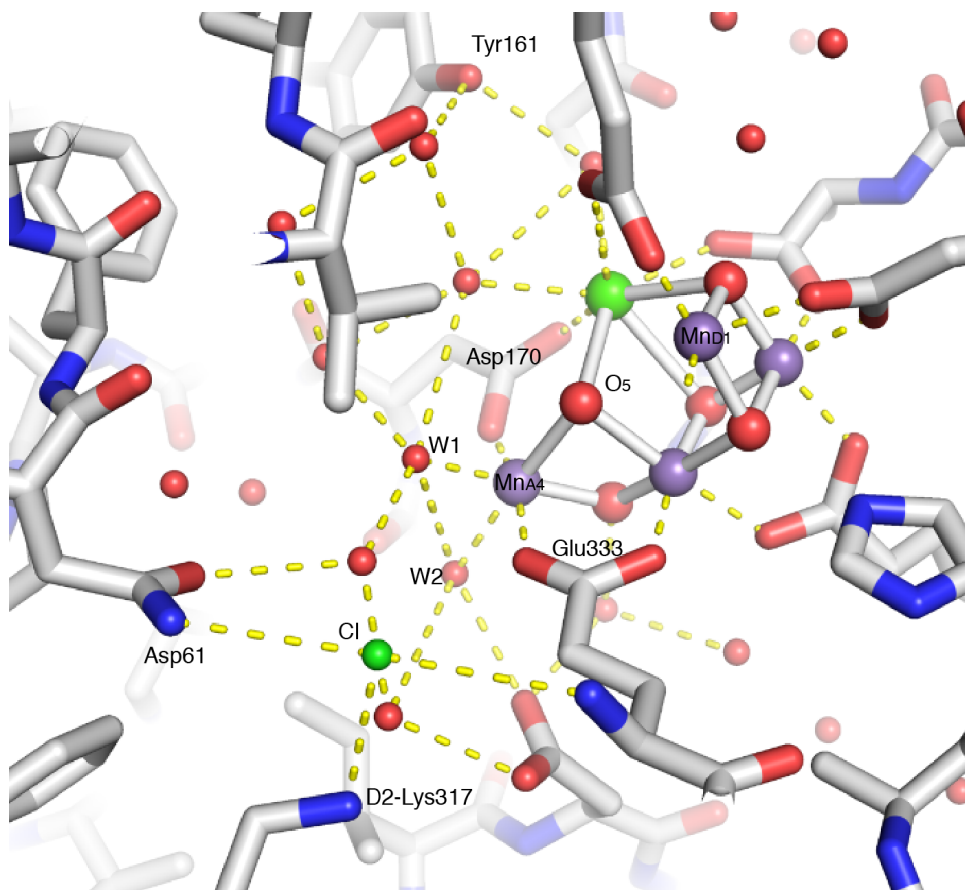

**Figure S7.** The hydrogen bonding network that extends from W1 and W2 that are ligated to the  $\text{Mn}_4\text{CaO}_5$  cluster.<sup>3</sup>

DFT coordinates of the high-layer structure shown in Figure 7a

|    |            |            |           |
|----|------------|------------|-----------|
| Mn | 190.419998 | 97.260002  | 83.971001 |
| Mn | 191.869003 | 99.417000  | 83.207001 |
| Mn | 189.266006 | 99.855003  | 83.773003 |
| Mn | 187.438995 | 100.379997 | 86.115997 |
| Ca | 191.112000 | 99.200996  | 86.570000 |
| O  | 191.873993 | 98.151001  | 84.499001 |
| O  | 190.873993 | 100.432999 | 84.285004 |
| O  | 190.240005 | 98.592003  | 82.686996 |
| O  | 188.488998 | 101.053001 | 84.869003 |
| O  | 189.337006 | 98.416000  | 84.936996 |
| C  | 189.419006 | 102.188004 | 89.382004 |
| H  | 190.067993 | 103.065002 | 89.444000 |
| H  | 189.839996 | 101.453003 | 90.081001 |
| C  | 189.552994 | 101.524002 | 88.024002 |
| O  | 190.653000 | 101.494003 | 87.439003 |
| O  | 188.533997 | 100.860001 | 87.603996 |
| C  | 192.572998 | 93.980003  | 87.802002 |
| H  | 191.962997 | 94.012001  | 88.709999 |
| H  | 193.438995 | 94.636002  | 87.928001 |
| C  | 191.830994 | 94.346001  | 86.522003 |
| H  | 192.563995 | 94.292000  | 85.711998 |
| H  | 191.033997 | 93.629997  | 86.294998 |
| C  | 191.237000 | 95.705002  | 86.288002 |
| O  | 191.235992 | 96.644997  | 87.097000 |
| O  | 190.781998 | 95.803001  | 85.078003 |
| C  | 185.692993 | 94.306000  | 83.174004 |
| H  | 185.281998 | 94.788002  | 84.056999 |
| H  | 185.854996 | 93.272003  | 83.481003 |
| C  | 187.007996 | 94.975998  | 82.956001 |
| N  | 187.945007 | 94.565002  | 82.033997 |
| H  | 187.813995 | 93.831001  | 81.341003 |
| C  | 189.080994 | 95.253998  | 82.208000 |
| H  | 189.988007 | 95.086998  | 81.652000 |
| N  | 188.925995 | 96.125000  | 83.190002 |
| C  | 187.636993 | 95.970001  | 83.658997 |
| H  | 187.270004 | 96.553001  | 84.490997 |
| C  | 185.100006 | 98.751999  | 81.431999 |
| H  | 186.056000 | 98.393997  | 81.050003 |
| H  | 184.987000 | 99.778000  | 81.068001 |
| C  | 185.171005 | 98.734001  | 82.955002 |
| H  | 184.309006 | 99.216003  | 83.419998 |
| H  | 185.192001 | 97.704002  | 83.332001 |
| C  | 186.421005 | 99.280998  | 83.596001 |
| O  | 187.503998 | 99.347000  | 82.963997 |

|   |            |            |           |
|---|------------|------------|-----------|
| O | 186.296005 | 99.539001  | 84.844002 |
| C | 189.718002 | 98.241997  | 76.598999 |
| H | 189.177994 | 97.509003  | 75.999001 |
| H | 190.783997 | 98.047997  | 76.439003 |
| C | 189.408997 | 98.057999  | 78.046997 |
| N | 188.218002 | 97.523003  | 78.511002 |
| C | 188.207993 | 97.504997  | 79.845001 |
| H | 187.408005 | 97.115997  | 80.456001 |
| N | 189.352005 | 98.019997  | 80.260002 |
| H | 189.610992 | 98.179001  | 81.255997 |
| C | 190.117996 | 98.370003  | 79.171997 |
| H | 191.100998 | 98.799004  | 79.276001 |
| C | 193.432999 | 96.075996  | 81.094002 |
| H | 192.787994 | 95.703003  | 80.290001 |
| H | 193.778000 | 95.205002  | 81.653999 |
| C | 192.589996 | 96.931999  | 82.004997 |
| O | 192.854004 | 98.172997  | 82.073997 |
| O | 191.684006 | 96.338997  | 82.670998 |
| C | 195.371994 | 100.612000 | 84.882004 |
| H | 195.804001 | 100.050003 | 85.711998 |
| C | 195.597000 | 102.112000 | 85.061996 |
| H | 195.033997 | 102.692001 | 84.321999 |
| H | 195.255005 | 102.414001 | 86.057999 |
| H | 196.656006 | 102.365997 | 84.983002 |
| C | 193.903000 | 100.313004 | 84.861000 |
| O | 193.227005 | 100.211998 | 85.876999 |
| O | 193.460007 | 100.143997 | 83.639000 |
| C | 191.628998 | 103.098000 | 80.143997 |
| H | 192.509995 | 102.628998 | 79.703003 |
| H | 191.914001 | 103.362999 | 81.169998 |
| C | 190.445999 | 102.122002 | 80.238998 |
| H | 189.494995 | 102.649002 | 80.322998 |
| H | 190.384995 | 101.481003 | 79.349998 |
| C | 190.556000 | 101.203003 | 81.444000 |
| O | 191.677994 | 100.649002 | 81.695000 |
| O | 189.507004 | 101.039001 | 82.142998 |
| C | 192.552002 | 108.153000 | 84.084999 |
| H | 192.479996 | 108.474998 | 85.129997 |
| H | 191.554001 | 107.810997 | 83.793999 |
| C | 193.585007 | 107.022003 | 83.970001 |
| H | 193.707993 | 106.685997 | 82.935997 |
| H | 194.569000 | 107.373001 | 84.297997 |
| C | 193.270996 | 105.811996 | 84.852997 |
| H | 194.095001 | 105.095001 | 84.776001 |
| H | 193.188004 | 106.132004 | 85.902000 |
| N | 192.039993 | 105.128998 | 84.440002 |

|   |            |            |           |
|---|------------|------------|-----------|
| H | 191.311996 | 105.717003 | 84.042999 |
| C | 191.593002 | 103.996002 | 85.008003 |
| N | 192.354004 | 103.362999 | 85.912003 |
| H | 193.126007 | 103.859001 | 86.351997 |
| H | 191.947998 | 102.595001 | 86.439003 |
| N | 190.421005 | 103.475998 | 84.644997 |
| H | 189.888000 | 103.822998 | 83.845001 |
| H | 190.097000 | 102.587997 | 85.017998 |
| H | 187.582001 | 99.809998  | 90.626999 |
| O | 187.572998 | 99.114998  | 89.944000 |
| H | 187.621994 | 98.242996  | 90.426003 |
| H | 184.026993 | 101.000000 | 88.875999 |
| O | 184.078995 | 100.544998 | 88.010002 |
| H | 183.201996 | 100.661003 | 87.601997 |
| H | 186.554993 | 104.876999 | 84.739998 |
| O | 186.962997 | 103.997002 | 84.674004 |
| H | 186.139008 | 103.470001 | 84.477997 |
| H | 192.845001 | 98.106003  | 88.769997 |
| O | 193.042007 | 98.439003  | 87.876999 |
| H | 193.779007 | 99.075996  | 87.991997 |
| H | 190.048004 | 97.820000  | 89.014999 |
| O | 189.957993 | 98.711998  | 88.626999 |
| H | 189.108002 | 99.041000  | 88.988998 |
| H | 191.186996 | 96.488998  | 90.247002 |
| O | 190.442001 | 96.144997  | 89.722000 |
| H | 190.800003 | 96.053001  | 88.811996 |
| H | 193.229004 | 97.206001  | 85.084999 |
| O | 193.919998 | 96.792999  | 85.636002 |
| H | 193.582993 | 96.987999  | 86.531998 |
| H | 186.815994 | 99.255997  | 88.442001 |
| O | 186.481995 | 99.204002  | 87.507004 |
| H | 185.511993 | 99.301003  | 87.539001 |
| H | 185.462006 | 102.333000 | 85.776001 |
| O | 185.938004 | 101.950996 | 86.550003 |
| H | 185.207993 | 101.593002 | 87.106003 |
| H | 188.809998 | 96.373001  | 90.598999 |
| O | 188.104996 | 96.816002  | 91.101997 |
| H | 187.529999 | 96.126999  | 91.470001 |
| H | 188.477997 | 102.588997 | 82.349998 |
| O | 188.391006 | 103.556999 | 82.310997 |
| H | 187.787003 | 103.755997 | 83.056000 |
| H | 187.434998 | 97.231003  | 77.932999 |

DFT coordinates of the high-layer structure shown in Figure 7b

|    |            |            |           |
|----|------------|------------|-----------|
| Mn | 190.492004 | 97.207001  | 83.913002 |
| Mn | 191.834000 | 99.448997  | 83.236000 |
| Mn | 189.209000 | 100.018997 | 83.705002 |
| Mn | 187.440994 | 100.448997 | 86.164001 |
| Ca | 191.117004 | 99.254997  | 86.621002 |
| O  | 191.850006 | 98.154999  | 84.515999 |
| O  | 190.854996 | 100.462997 | 84.289001 |
| O  | 190.246994 | 98.585999  | 82.706001 |
| O  | 188.455002 | 101.194000 | 84.676003 |
| O  | 189.315002 | 98.421997  | 85.047997 |
| C  | 189.507996 | 102.255997 | 89.428001 |
| H  | 190.136993 | 103.143997 | 89.530998 |
| H  | 189.931000 | 101.514999 | 90.119003 |
| C  | 189.699997 | 101.633003 | 88.056999 |
| O  | 190.863998 | 101.511002 | 87.594002 |
| O  | 188.695999 | 101.126999 | 87.464996 |
| C  | 192.576004 | 93.980003  | 87.803001 |
| H  | 191.960999 | 94.013000  | 88.708000 |
| H  | 193.442993 | 94.635002  | 87.932999 |
| C  | 191.841995 | 94.341003  | 86.518997 |
| H  | 192.578003 | 94.277000  | 85.710999 |
| H  | 191.042999 | 93.625999  | 86.293999 |
| C  | 191.251999 | 95.697998  | 86.266998 |
| O  | 191.225998 | 96.648003  | 87.055000 |
| O  | 190.813004 | 95.773003  | 85.039001 |
| C  | 185.690002 | 94.303001  | 83.172997 |
| H  | 185.283997 | 94.795998  | 84.052002 |
| H  | 185.845001 | 93.269997  | 83.487999 |
| C  | 187.009003 | 94.960999  | 82.946999 |
| N  | 187.938995 | 94.555000  | 82.017998 |
| H  | 187.800995 | 93.825996  | 81.320999 |
| C  | 189.078003 | 95.237999  | 82.190002 |
| H  | 189.977005 | 95.066002  | 81.624001 |
| N  | 188.936005 | 96.105003  | 83.178001 |
| C  | 187.645004 | 95.947998  | 83.650002 |
| H  | 187.246002 | 96.512001  | 84.480003 |
| C  | 185.100998 | 98.755997  | 81.421997 |
| H  | 186.054001 | 98.408997  | 81.022003 |
| H  | 184.975006 | 99.782997  | 81.066002 |
| C  | 185.199005 | 98.728996  | 82.941002 |
| H  | 184.354004 | 99.221001  | 83.427002 |
| H  | 185.205994 | 97.699997  | 83.319000 |
| C  | 186.462006 | 99.263000  | 83.570000 |
| O  | 187.542999 | 99.345001  | 82.903999 |

|   |            |            |           |
|---|------------|------------|-----------|
| O | 186.386002 | 99.476997  | 84.811996 |
| C | 189.716003 | 98.241997  | 76.600998 |
| H | 189.175003 | 97.508003  | 76.000999 |
| H | 190.781006 | 98.045998  | 76.442001 |
| C | 189.404999 | 98.059998  | 78.049004 |
| N | 188.212006 | 97.532997  | 78.515999 |
| C | 188.201004 | 97.518997  | 79.848999 |
| H | 187.397995 | 97.139999  | 80.460999 |
| N | 189.348999 | 98.028000  | 80.264000 |
| H | 189.608994 | 98.189003  | 81.260002 |
| C | 190.115997 | 98.370003  | 79.172997 |
| H | 191.102997 | 98.792999  | 79.271004 |
| C | 193.429993 | 96.082001  | 81.101997 |
| H | 192.776001 | 95.714996  | 80.303001 |
| H | 193.772003 | 95.209999  | 81.663002 |
| C | 192.610992 | 96.959999  | 82.012001 |
| O | 192.871994 | 98.182999  | 82.098000 |
| O | 191.690002 | 96.356003  | 82.686996 |
| C | 195.367004 | 100.617996 | 84.872002 |
| H | 195.804001 | 100.069000 | 85.709000 |
| C | 195.578995 | 102.121002 | 85.037003 |
| H | 195.022003 | 102.689003 | 84.283997 |
| H | 195.223007 | 102.431999 | 86.025002 |
| H | 196.638000 | 102.378998 | 84.968002 |
| C | 193.903000 | 100.304001 | 84.852997 |
| O | 193.237000 | 100.160004 | 85.866997 |
| O | 193.445999 | 100.157997 | 83.630997 |
| C | 191.623993 | 103.101997 | 80.142998 |
| H | 192.492996 | 102.621002 | 79.692001 |
| H | 191.923996 | 103.365997 | 81.165001 |
| C | 190.427002 | 102.146004 | 80.250999 |
| H | 189.485001 | 102.686996 | 80.360001 |
| H | 190.337997 | 101.508003 | 79.362000 |
| C | 190.552994 | 101.227997 | 81.449997 |
| O | 191.660995 | 100.669998 | 81.709000 |
| O | 189.488998 | 101.078003 | 82.148003 |
| C | 192.552994 | 108.155998 | 84.086998 |
| H | 192.477997 | 108.480003 | 85.132004 |
| H | 191.556000 | 107.810997 | 83.795998 |
| C | 193.587006 | 107.026001 | 83.977997 |
| H | 193.709000 | 106.683998 | 82.945999 |
| H | 194.572006 | 107.382004 | 84.301003 |
| C | 193.278000 | 105.822998 | 84.871002 |
| H | 194.102005 | 105.105003 | 84.795998 |
| H | 193.197998 | 106.150002 | 85.917000 |
| N | 192.044998 | 105.138000 | 84.466003 |

|   |            |            |           |
|---|------------|------------|-----------|
| H | 191.322998 | 105.725998 | 84.056000 |
| C | 191.580994 | 104.028000 | 85.066002 |
| N | 192.332993 | 103.399002 | 85.978996 |
| H | 193.123993 | 103.892998 | 86.387001 |
| H | 191.903000 | 102.684998 | 86.566002 |
| N | 190.397003 | 103.526001 | 84.713997 |
| H | 189.856995 | 103.901001 | 83.934998 |
| H | 190.042999 | 102.648003 | 85.083000 |
| H | 187.701996 | 99.893997  | 90.676003 |
| O | 187.684998 | 99.223000  | 89.968002 |
| H | 187.662003 | 98.346001  | 90.428001 |
| H | 184.033005 | 101.049004 | 88.908997 |
| O | 184.039993 | 100.586998 | 88.043999 |
| H | 183.160995 | 100.761002 | 87.666000 |
| H | 186.494003 | 104.846001 | 84.802002 |
| O | 186.959000 | 103.997002 | 84.713997 |
| H | 186.164993 | 103.424004 | 84.528999 |
| H | 192.834000 | 98.098999  | 88.779999 |
| O | 193.054993 | 98.408997  | 87.883003 |
| H | 193.783005 | 99.054001  | 88.007004 |
| H | 190.031006 | 97.825996  | 89.004997 |
| O | 189.970001 | 98.727997  | 88.637001 |
| H | 189.136993 | 99.079002  | 89.031998 |
| H | 191.179993 | 96.504997  | 90.248001 |
| O | 190.451996 | 96.137001  | 89.714996 |
| H | 190.820007 | 96.054001  | 88.811996 |
| H | 193.225998 | 97.240997  | 85.125999 |
| O | 193.919998 | 96.789001  | 85.639000 |
| H | 193.617996 | 96.973999  | 86.551003 |
| H | 187.059006 | 99.359001  | 88.239998 |
| O | 186.953995 | 99.177002  | 87.282997 |
| H | 188.473999 | 98.045998  | 85.362000 |
| H | 185.371002 | 102.239998 | 85.820000 |
| O | 185.867004 | 101.849998 | 86.575996 |
| H | 185.162003 | 101.403000 | 87.125999 |
| H | 188.785004 | 96.389000  | 90.589996 |
| O | 188.104996 | 96.848000  | 91.109001 |
| H | 187.509003 | 96.170998  | 91.463997 |
| H | 188.337006 | 102.615997 | 82.394997 |
| O | 188.294998 | 103.581001 | 82.301003 |
| H | 187.729004 | 103.834000 | 83.059998 |
| H | 187.423996 | 97.245003  | 77.940002 |

## References:

- (1) Newville, M. *Journal Of Synchrotron Radiation* **2001**, 8, 322.
- (2) Rehr, J. J.; Albers, R. C. *Reviews of Modern Physics* **2000**, 72, 621.
- (3) Suga, M.; Akita, F.; Hirata, K.; Ueno, G.; Murakami, H.; Nakajima, Y.; Shimizu, T.; Yamashita, K.; Yamamoto, M.; Ago, H.; Shen, J.-R. *Nature* **2015**, 517, 99.
